# Supplementary material
Source: Springer Nature journal article supplement (https://www.springermedizin.de/resource/supplementary/13256_2010_1559_MOESM1_ESM.pdf/9647916)
Supplement: MOESM1 [file 9647916]

CYP3A4 / 5  
CYP2B6  
(45%)

2-and 3-  
dechloroethyl  
ifosfamide  
(inactive)

+

chloroacetaldehyde

Ifosfamide

CYP3A4/5  
(55%)

4-hydroxy  
ifosfamide  
(unstable)

↔

aldoifosfamide

Isophosphoramidate  
mustard  
(active moiety)

+

acrolein
